# Supplementary material
Source: PubMed Central journal article supplement (PMC3285349)

**Supplemental Figure legends** (Supplemental data include six figures)

**Figure S1A. Modeled structure of Hpo C-terminal coiled coil domain.** NMR structure of Mst1 coiled coil domain was used as a template for modeling (25). The C-terminus of Hpo dimerize via an antiparallel coiled coil with kinked N-terminus.

**Figure S1B. Quantification of Hpo mutants' wings.** Quantification of wing size area in  $10^5$  pixel for Hpo and the mutants (N=20). N is the number of wings analyzed. Error bars indicate standard error of the mean (SEM).

**Figure S2. FRET assay of S2 cells expressing CFP/YFP tagged Hpo constructs.** S2 cells were transfected with indicated CFP-tagged or YFP-tagged Hpo constructs in FRET assay. CFP signal was obtained once before and once after photobleaching YFP using the 80% power of 514 nm laser line to bleach 12 times at the selected area, leaving the other part as internal control.

**Figure S3A. Hpo with N terminal mutation still interact with each other.** Extracts from S2 cells expressing indicated Flag-Hpo-N mutations were incubated with GST or indicated GST fusion proteins. The bound proteins were analyzed by Western blot with Flag antibody.

**Figure S3B. Hpo N-terminal truncated mutants interact with the endogenous Hpo, but Hpo-C-I634D barely binds endogenous Hpo.** S2 cells were transfected with indicated Hpo N- or C-terminal truncated mutants, and the Flag-Hpo-N or -C was immunoprecipitated with anti-Flag antibody. Western blots were done to detect the endogenous Hpo using the endogenous Hpo antibody. Wild type Hpo-N interact endogenous Hpo weakly because of the lower protein level.

**Figure S4. Conformational perturbation of the homo-dimeric Hpo kinase domain affects Hpo kinase activity.** S2 cells were transfected with the full length Hpo with various homo-dimeric interface mutations respectively (H240A, M242E, M242P, R243P, R243A, I245P) or transfected with the N-terminal homo-dimeric interface mutations of Hpo-N (H240A-N, M242E-N, M242P-N, R243P-N, R243A-N, I245P-N) together with Sd, Yki plus the  $3\times Sd2-Luc$  reporter genes, and the cell lysates were subjected to dual luciferase assay. H240A is a control. Error bars indicate standard deviation.

**Figure S5. Induced dimer of Hpo kinase domain could promote higher pathway activity.** S2 cells were transfected with the indicated kinase domain of Hpo or Hpo hybrid variants together with Sd, Yki plus the  $3\times Sd2-Luc$  reporter gene, and the cell lysates were subjected to dual luciferase assay. Error bars indicate standard deviation (triplicate wells). AP20187 treatment did not influence the activity of Hpo-N. N terminal or C terminal of Hpo kinase domain fused with Fv2 domain (Fv2-HpoN, HpoN-Fv2) exhibit higher activity when treated with AP20187 to induce dimer. Also HpoN-T195E-Fv2 showed inducible activity by AP20187 but not for M242E

or T195A.

**Figure S6. Hpo variants genetically interact with Yki.** Front views of adult flies from wild type eyes of *GMR* (A), *GMR-Gal4 UAS-Yki* (B), *GMR-Gal4 UAS-Yki* plus Hpo wild type (C), *GMR-Gal4 UAS-Yki* plus Hpo-KD (D), *GMR-Gal4 UAS-Yki* plus Hpo variants (E-I). (J) Quantification of wing size area in  $10^5$  pixel for Hpo and the mutants (N=20). N is the number of wings analyzed. Error bars indicate standard error of the mean (SEM).

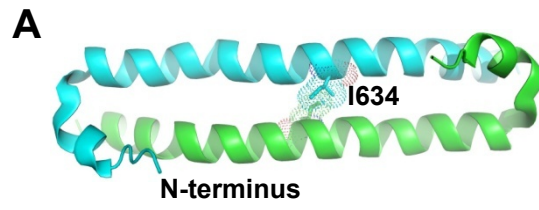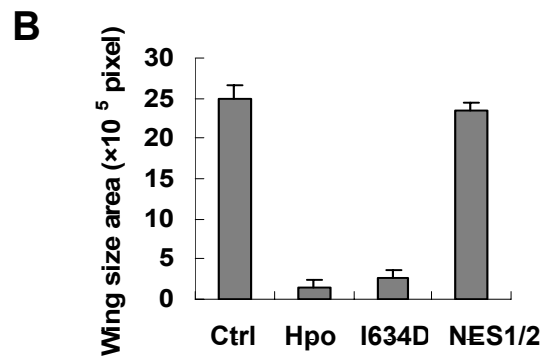

Jin\_Figure S2

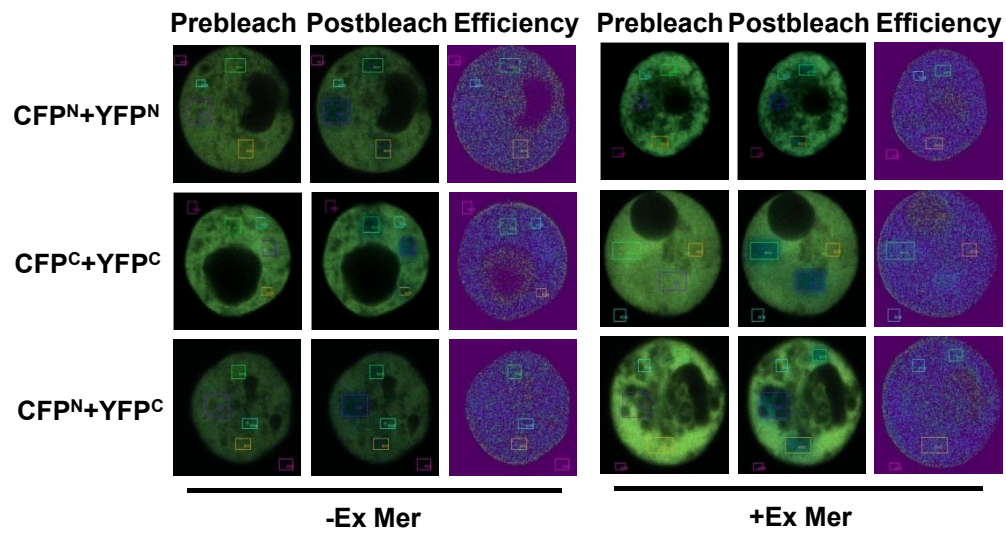

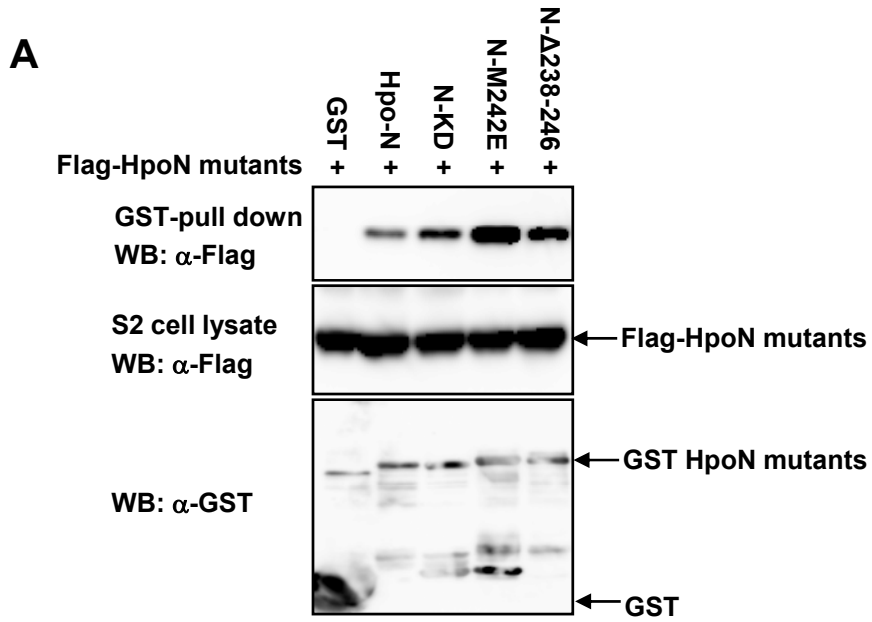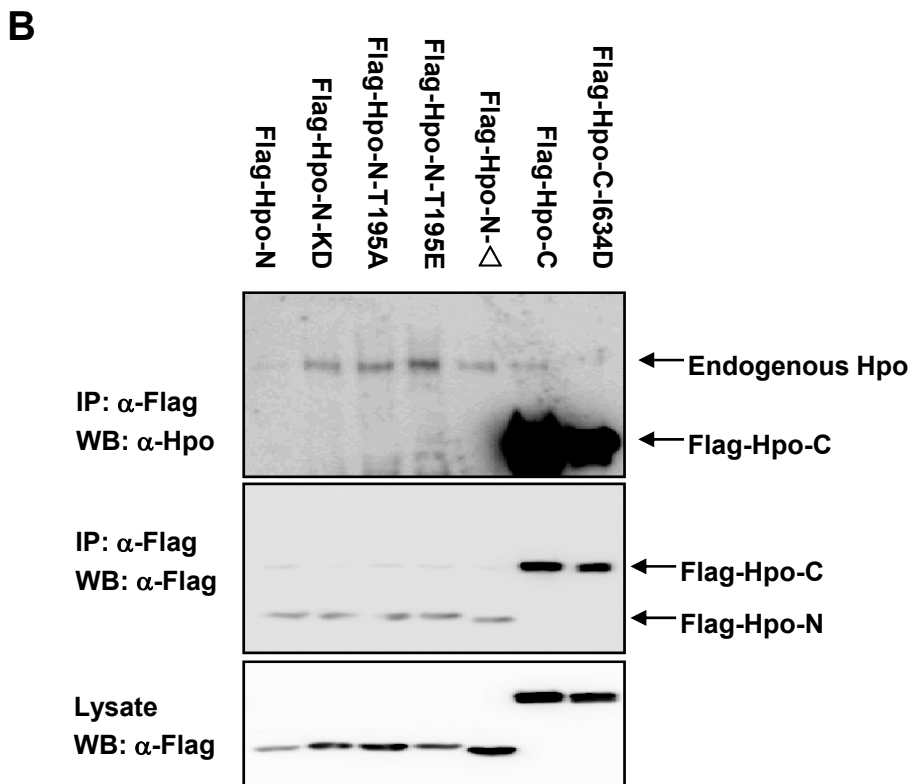

Jin\_Figure S4

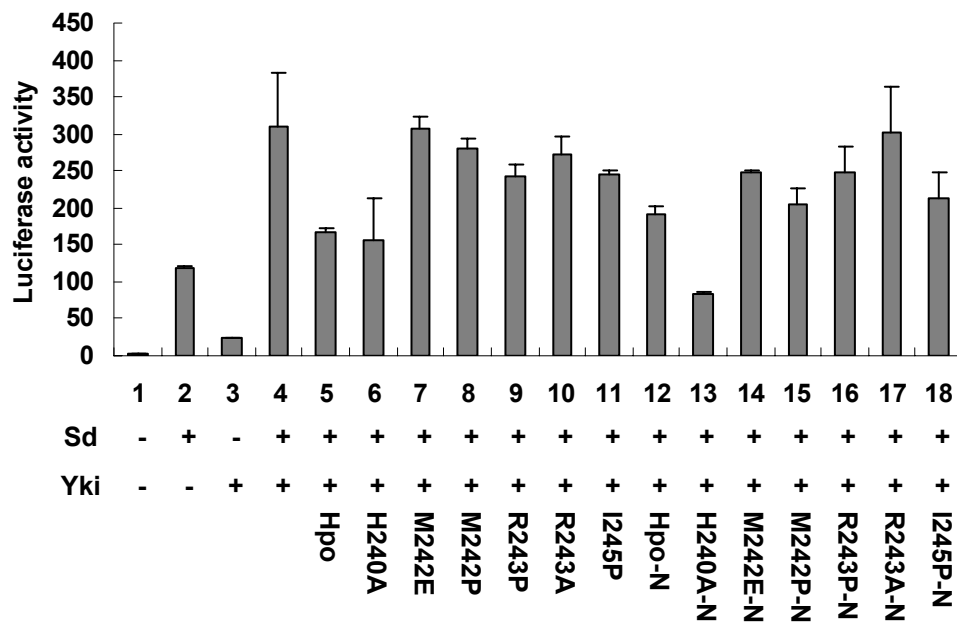



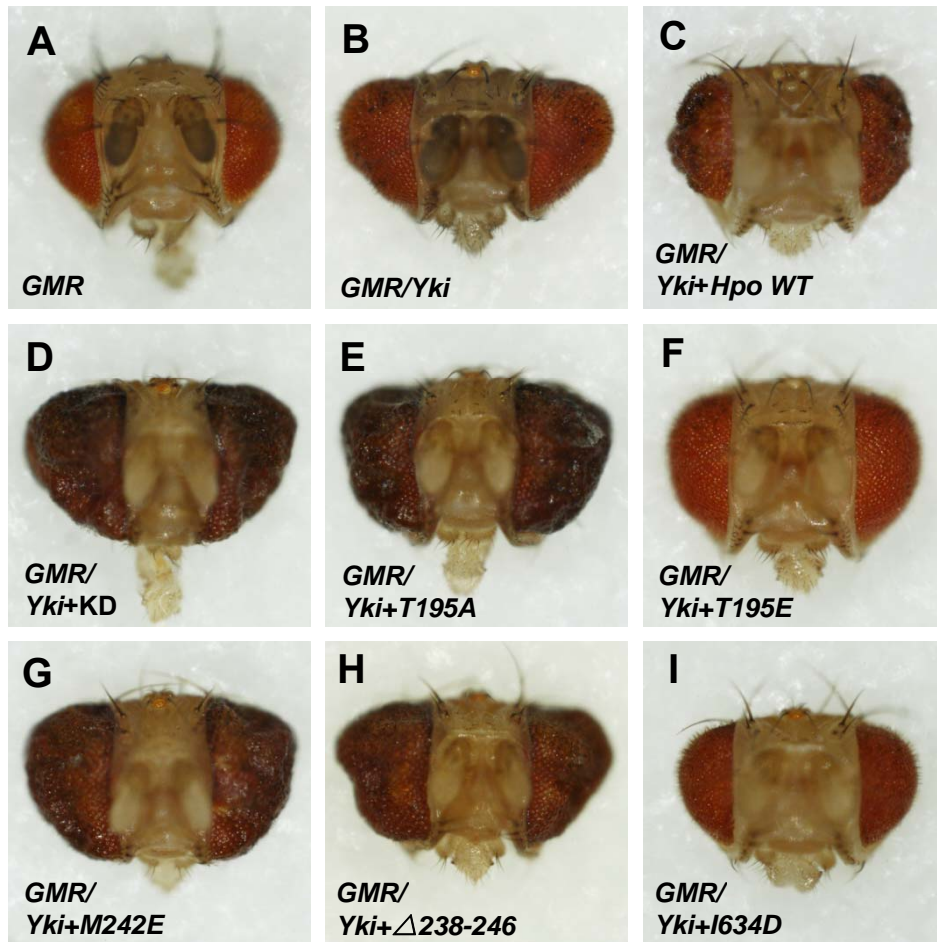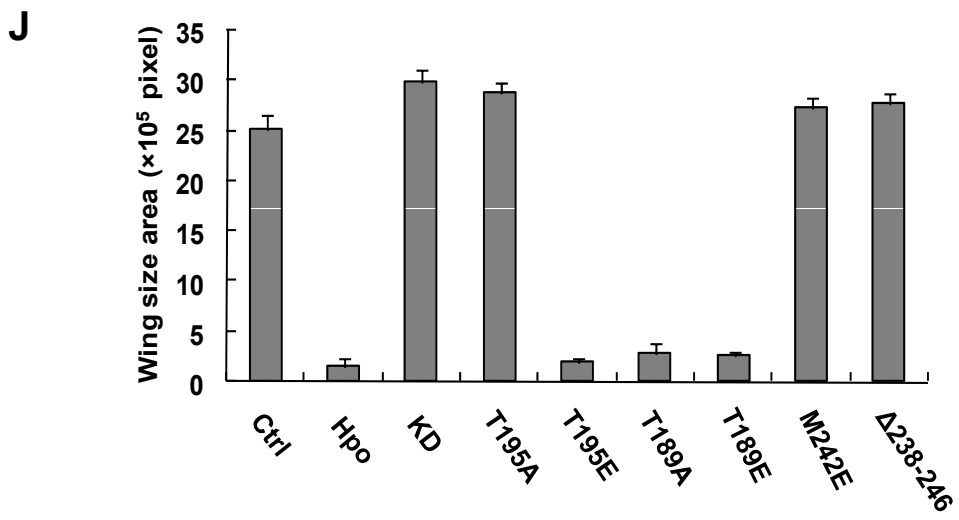

Supplement: supp_M111.310334_jbc.M111.310334-1.pdf [file supp_M111.310334_jbc.M111.310334-1.pdf]
